# Supplementary material for: Immortalizing Mesenchymal Stromal Cells from Aged Donors While Keeping Their Essential Features
Source: Stem Cells Int. 2020 Jun 16;2020:5726947. doi: 10.1155/2020/5726947 (PMC7315279; doi:10.1155/2020/5726947)
Supplement: Supplementary Materials — Supplementary Table S1: summary table showing the absorbance measurements in 3 different experiments (CCK8 1, 2, and 3 sheets) and the mean results from these experiments (data set sheet): before spinoculation (PRE-SPIN), after spinoculation (POST-SPIN), after three day-incubation with 0.5-5 mM VPA (POST-VPA), and after puromycin selection (POST-PURO). [file 5726947.f1.xlsx]

## Sheet: CCK-8 1
PRE-SPIN	POST-SPIN	POST-VPA	POST-PURO																PROMEDIO				DESVIACIÓN ESTÁNDAR
1.1197	0.546767	0.505633	0.550567		51.1685	54.8421	50.8291	0.5 mM	After spinoculation		58.9439	43.9187	75.406		40.7166	45.8618	40.4511		50.2763	48.2075	55.5621		9.14629	5.82723	17.9517
1.1197	0.944033	0.990167	0.4703		15.6887	11.5686	57.9977	1 mM	After VPA addition		53.4259	33.5509	74.7078		28.9993	39.2287	24.0598		32.7046	28.116	52.2551		19.1395	14.609	25.8077
1.1197	0.6446	0.6722	0.7374		42.431	39.9661	34.1431	2 mM	After puromycin selection		60.6322	47.1841	80.8307		41.8976	48.2946	56.925		48.3203	45.1482	57.2996		10.6658	4.5221	23.3461
1.1197	0.506667	0.513033	0.111833		54.7498	54.1812	90.0122	3 mM			60.8504	56.6912	90.8766		58.4608	56.9087	95.0497		58.0203	55.927	91.9795		3.07407	1.51585	2.69374
1.1197	0.6683	0.600633	0.112233		40.3144	46.3577	89.9765	5 mM			50.1184	43.3108	93.3745		33.1997	40.3455	90.5488		41.2108	43.338	91.2999		8.49489	3.00618	1.81927
1.1197	0.5254	0.626167			53.0767	44.0773					55.6544	42.3011			57.909	49.2731			55.5467	45.2172			2.41793	3.62307
		PRE-SPIN
Well 1	1.1762	1.2291	1.2247	1.21	0.0293542	2.42597	1.10107	1.1197
Well 2	1.2531	1.1918	1.2056	1.21683	0.0321569	2.64267	1.1079	0.0265766
Well 3	1.2178	1.2895	1.2699	1.25907	0.0370573	2.94323	1.15013	2.37354
White	0.1057	0.11	0.1111	0.108933	0.00285365	2.61963
		POST-SPIN
0.5 mM	0.7126	0.6945	0.6828	0.696633	0.0150141	2.15524	0.546767
1 mM	1.1026	1.0885	1.0906	1.0939	0.00760721	0.695421	0.944033
2 mM	0.8188	0.7881	0.7765	0.794467	0.0218569	2.75114	0.6446
3 mM	0.6409	0.6639	0.6648	0.656533	0.0135463	2.06331	0.506667
5 mM	0.7922	0.8283	0.834	0.818167	0.0226677	2.77054	0.6683
5 mM (Control)	0.6716	0.6735	0.6807	0.675267	0.00480036	0.710883	0.5254
White	0.1437	0.1527	0.1532	0.149867	0.00534634	3.5674
		POST-VPA
0.5 mM	0.6203	0.6159	0.6105	0.615567	0.0049085	0.797396	0.505633
1 mM	1.0867	1.0899	1.1237	1.1001	0.0205008	1.86354	0.990167
2 mM	0.7597	0.7826	0.8041	0.782133	0.0222037	2.83886	0.6722
3 mM	0.6121	0.6253	0.6315	0.622967	0.00990824	1.59049	0.513033
5 mM	0.699	0.7165	0.7162	0.710567	0.0100181	1.40988	0.600633
5 mM (Control)	0.7259	0.7354	0.747	0.7361	0.0105674	1.43559	0.626167
White	0.1096	0.1069	0.1133	0.109933	0.003213	2.92268
		POST-PUROM
0.5 mM	0.6764	0.6439	0.6442	0.654833	0.0186779	2.85231	0.550567
1 mM	0.5548	0.5901	0.5788	0.574567	0.0180268	3.13745	0.4703
2 mM	0.8171	0.8504	0.8575	0.841667	0.0215695	2.56271	0.7374
3 mM	0.2078	0.2219	0.2186	0.2161	0.00737496	3.41275	0.111833
5 mM	0.2208	0.2152	0.2135	0.2165	0.00381969	1.76429	0.112233
White	0.1048	0.1036	0.1044	0.104267	0.000611009	0.586006

## Sheet: CCK-8 2
PRE-SPIN	POST-SPIN	POST-VPA	POST-PURO
2.21518	0.909467	1.2423	0.5448		58.9439	43.9187	75.406	0.5 mM	After spinoculation
2.21518	1.0317	1.47197	0.560267		53.4259	33.5509	74.7078	1 mM	After VPA addition
2.21518	0.872067	1.16997	0.424633		60.6322	47.1841	80.8307	2 mM	After puromycin selection
2.21518	0.867233	0.959367	0.2021		60.8504	56.6912	90.8766	3 mM
2.21518	1.10497	1.25577	0.146767		50.1184	43.3108	93.3745	5 mM
2.21518	0.982333	1.27813			55.6544	42.3011
		PRE-SPIN
Well 1	2.2771	2.3816	2.3329	2.33053	0.0522901	2.2437	2.20883	2.21518
Well 2	2.1492	2.2984	2.243	2.2302	0.0754191	3.38172	2.1085	0.109987
Well 3	2.4071	2.5226	2.42	2.4499	0.0632895	2.58335	2.3282	4.96517
White	0.1079	0.1292	0.128	0.1217	0.0119662	9.83254
		POST-SPIN
0.5 mM	1.1042	1.1028	1.1014	1.1028	0.00139999	0.126949	0.909467
1 mM	1.1627	1.2564	1.256	1.22503	0.0539826	4.40662	1.0317
2 mM	0.979	1.1213	1.0959	1.0654	0.0758948	7.12359	0.872067
3 mM	1.0239	1.0756	1.0822	1.06057	0.0319253	3.01021	0.867233
5 mM	1.2515	1.3169	1.3265	1.2983	0.0408133	3.14359	1.10497
5 mM (Control)	1.1015	1.1119	1.1482	1.12053	0.0245178	2.18805	0.982333
White 1	0.1872	0.1961	0.1967	0.193333	0.00532009	2.75177
White 2	0.135	0.1417	0.1379	0.1382	0.00336006	2.4313
		POST-VPA
0.5 mM	1.3464	1.4052	1.3899	1.3805	0.0305062	2.20979	1.2423
1 mM	1.5733	1.6086	1.6486	1.61017	0.0376744	2.33978	1.47197
2 mM	1.2197	1.3619	1.3429	1.30817	0.0772011	5.90148	1.16997
3 mM	1.1024	1.0935	1.0968	1.09757	0.00449922	0.409927	0.959367
5 mM	1.3824	1.3893	1.4102	1.39397	0.0144756	1.03845	1.25577
5 mM (Control)	1.4106	1.4401	1.3983	1.41633	0.0214817	1.51671	1.27813
White	0.135	0.1417	0.1379	0.1382	0.00336006	2.4313
		POST-PUROM
0.5 mM	0.6351	0.6989	0.6779	0.670633	0.0325148	4.84837	0.5448
1 mM	0.704	0.6904	0.6639	0.6861	0.0203929	2.97229	0.560267
2 mM	0.5465	0.5597	0.5452	0.550467	0.00802268	1.45743	0.424633
3 mM	0.3313	0.3307	0.3218	0.327933	0.00532009	1.62231	0.2021
5 mM	0.2709	0.2719	0.275	0.2726	0.00213776	0.784209	0.146767
White	0.1302	0.1253	0.122	0.125833	0.00412593	3.27889

## Sheet: CCK-8 3
PRE-SPIN	POST-SPIN	POST-VPA	POST-PURO
3.06241	1.8155	1.65793	1.82363		40.7166	45.8618	40.4511	0.5 mM	After spinoculation
3.06241	2.17433	1.86107	2.3256		28.9993	39.2287	24.0598	1 mM	After VPA addition
3.06241	1.77933	1.58343	1.31913		41.8976	48.2946	56.925	2 mM	After puromycin selection
3.06241	1.2721	1.31963	0.1516		58.4608	56.9087	95.0497	3 mM
3.06241	2.0457	1.82687	0.289433		33.1997	40.3455	90.5488	5 mM
3.06241	1.289	1.55347			57.909	49.2731
		PRE-SPIN
Well 1	3.4423	3.5752	3.5293	3.5156	0.0675009	1.92004	3.36287	3.06241
Well 2	3.0561	3.0113	3.057	3.04147	0.0261289	0.859088	2.88873	0.261257
Well 3	3.1213	3.0558	3.088	3.08837	0.0327515	1.06048	2.93563	8.53108
White	0.1589	0.1509	0.1484	0.152733	0.00548482	3.59111
		POST-SPIN
0.5 mM	1.8525	1.9084	1.9835	1.9148	0.0657341	3.43295	1.8155
1 mM	2.1963	2.3327	2.2919	2.27363	0.0700106	3.07924	2.17433
2 mM	1.8357	1.9117	1.8885	1.87863	0.0389488	2.07325	1.77933
3 mM	1.4718	1.468	1.1744	1.3714	0.170618	12.4411	1.2721
5 mM	2.0485	2.1871	2.1994	2.145	0.0837974	3.90664	2.0457
5 mM (Control)	1.3494	1.4003	1.4106	1.38677	0.0327677	2.36288	1.289
White 1	0.0914	0.1032	0.1033	0.0993	0.00684179	6.89002
White 2	0.1002	0.0989	0.0942	0.0977667	0.00315647	3.22858
		POST-VPA
0.5 mM	1.7336	1.8167	1.7948	1.7817	0.043071	2.41741	1.65793
1 mM	1.9466	1.9907	2.0172	1.98483	0.0356638	1.79681	1.86107
2 mM	1.6391	1.7471	1.7354	1.7072	0.0592658	3.47152	1.58343
3 mM	1.4157	1.4532	1.4613	1.4434	0.0243284	1.68549	1.31963
5 mM	1.9245	1.9597	1.9677	1.95063	0.0229829	1.17823	1.82687
5 mM (Control)	1.6946	1.6893	1.6478	1.67723	0.0256274	1.52796	1.55347
White	0.1229	0.1237	0.1247	0.123767	0.00090185	0.72867
		POST-PUROM
0.5 mM	1.8049	1.9865	1.9531	1.91483	0.0966586	5.04789	1.82363
1 mM	2.2739	2.4957	2.4808	2.4168	0.123979	5.12988	2.3256
2 mM	1.3763	1.4288	1.4259	1.41033	0.0295094	2.09237	1.31913
3 mM	0.2359	0.2439	0.2486	0.2428	0.00642106	2.64459	0.1516
5 mM	0.3688	0.393	0.3801	0.380633	0.0121088	3.18123	0.289433
White	0.0952	0.0851	0.0933	0.0912	0.00536749	5.88541

## Sheet: Data Set
	After spinoculation	After VPA addition	After selection		After spinoculation	After VPA addition	After selection		After spinoculation	After VPA addition	After selection
0.5 mM	51.1685	54.8421	50.8291		58.9439	43.9187	75.406		40.7166	45.8618	40.4511
1 mM	15.6887	11.5686	57.9977		53.4259	33.5509	74.7078		28.9993	39.2287	24.0598
2 mM	42.431	39.9661	34.1431		60.6322	47.1841	80.8307		41.8976	48.2946	56.925
3 mM	54.7498	54.1812	90.0122		60.8504	56.6912	90.8766		58.4608	56.9087	95.0497
5 mM	40.3144	46.3577	89.9765		50.1184	43.3108	93.3745		33.1997	40.3455	90.5488
	MEAN				DESVEST
	After spinoculation	After VPA addition	After selection		After spinoculation	After VPA addition	After selection
0.5 mM	50.2763	48.2075	55.5621		9.14629	5.82723	17.9517
1 mM	32.7046	28.116	52.2551		19.1395	14.609	25.8077
2 mM	48.3203	45.1482	57.2996		10.6658	4.5221	23.3461
3 mM	58.0203	55.927	91.9795		3.07407	1.51585	2.69374
5 mM	41.2108	43.338	91.2999		8.49489	3.00618	1.81927
